# Supplementary material
Source: PubMed Central journal article supplement (PMC5006933)
Supplement: NIHMS69274-supplement-Supporting_Information.pdf [file NIHMS69274-supplement-Supporting_Information.pdf]

## **SUPPORTING INFORMATION**

**Supplemental Figure 1.** Validation of valosin-containing protein (VCP) as a nonspecifically cross-reacting protein. VCP-directed IP from wild-type and DJ-1 knockout mice followed by Western blotting with a DJ-1-directed antibody unequivocally establishes nonspecific crossreactivity of the DJ-1-directed antibody with VCP. A VCP-directed polyclonal antibody was used to capture VCP side-by-side from tissue extracts of DJ-1<sup>-/-</sup> mice and wild-type mice which had been subjected to the tcTPC procedure. A subsequent Western blotting analysis in which the blotting membrane was probed with the DJ-1 antibody we had used for the DJ-1 interactome investigation (i) established that the DJ-1 antibody can cross-react with a 97 kDa band present in both DJ-1 knockout and wild-type mice, (ii) documented that this cross-reactive band is strongly enriched in the VCP directed immunoprecipitation eluate, and (iii) showed complete absence of DJ-1 in the same VCP immunoprecipitation eluate. Thus, the presence of DJ-1 in the interactome list could be explained by an apparent cross-reactivity of the commercial DJ-1 antibody we had employed for the generation of the interactome dataset. Extracts before co-IP (lanes 1 and 4), unbound co-IP material (lanes 2 and 5) and co-IP eluate fractions (lanes 3 and 6). Please note the increase in DJ-1 antibody signal for a band of ~95 kDa (VCP has apparent MW of 97kDa) following VCP directed co-IP from DJ-1 knockout mouse extracts (lanes 4 and 6).

**Supplemental Figure 2.** Determination of specific candidate DJ-1 interactors based on iTRAQ ratio comparisons. The WT:KO iTRAQ ratios of brain (115:114) (A) and liver (117:116) (B) DJ-1 interactomes and the HZ:KO iTRAQ ratios obtained for the DJ-1 interactome analysis in mouse embryonic stem cell lines (115:114) (C) are depicted graphically. A solid line indicates a baseline iTRAQ ratio of 1.0 (assuming no DJ-1-specific enrichment in a comparison of specific versus control) and dashed lines

represent thresholds of one and two standard deviations (SD) above the baseline calculated from the iTRAQ ratios observed in the individual subdatasets. Note that in addition to the bait protein (DJ-1), the iTRAQ ratios of two outliers in each graph were removed from the calculation of the standard deviations. Proteins which possessed ratios above the threshold of two SD are bolded.

**Supplemental Figure 3.** Significant correlation of brain and liver DJ-1 interactome data.

(A) Graph depicting the correlation between brain and liver iTRAQ ratios including the line of best fit (solid line) and 95% confidence intervals (dashed lines). A Pearson correlation coefficient of 0.857 was significant at a two-tailed  $P = 0.01$  level (SPSS ver. 18, IBM Corporation). (B) The theoretical relation between sample size and the Pearson correlation coefficient at six different powers and at a two-sided 0.01 significance level is depicted based on R statistical modeling source code (Quick-R, Robert I. Kabacoff, and 'pwr' code library, Stéphane Champely). As demonstrated by the intersection of the dashed lines, the brain and liver iTRAQ ratio sample size of 37 at a correlation coefficient of 0.857 is appropriate.

**Supplemental Tables.** Please refer to **Supplemental Tables 1, 2 or 3** for details of analyses summarized in **Tables 1, 2 or 3**, respectively. Depicted in these Supplemental Tables are information on proteins and peptides observed, including information on masses, percent sequence coverage, confidence scores, iTRAQ ratios, the calculation of average reporter ion intensities and the corresponding standard deviations of this calculation. Note that **Supplemental Tables 1, 2 or 3** depict analyses conducted with ProteinPilot, ProteinProspector and Mascot, respectively, and therefore the formats of the tables (and confidence scores) reflect the different designs of these search algorithms.

**Supplemental Table 1.** Details of DJ-1 candidate interactors in spectral counting-based comparison of formaldehyde crosslinked DJ-1 KO, HZ or WT ES cells +/- H<sub>2</sub>O<sub>2</sub>.

**Supplemental Table 2.** DJ-1 candidate interactors in spectral counting-based comparison of formaldehyde crosslinked DJ-1 KO, HZ or WT ES cells +/- H<sub>2</sub>O<sub>2</sub>.

**Supplemental Table 3.** DJ-1 candidate interactors in four-plex iTRAQ-based comparison of formaldehyde crosslinked DJ-1 KO, HZ or WT ES cells +/- H<sub>2</sub>O<sub>2</sub>.

Supplemental Figure 1

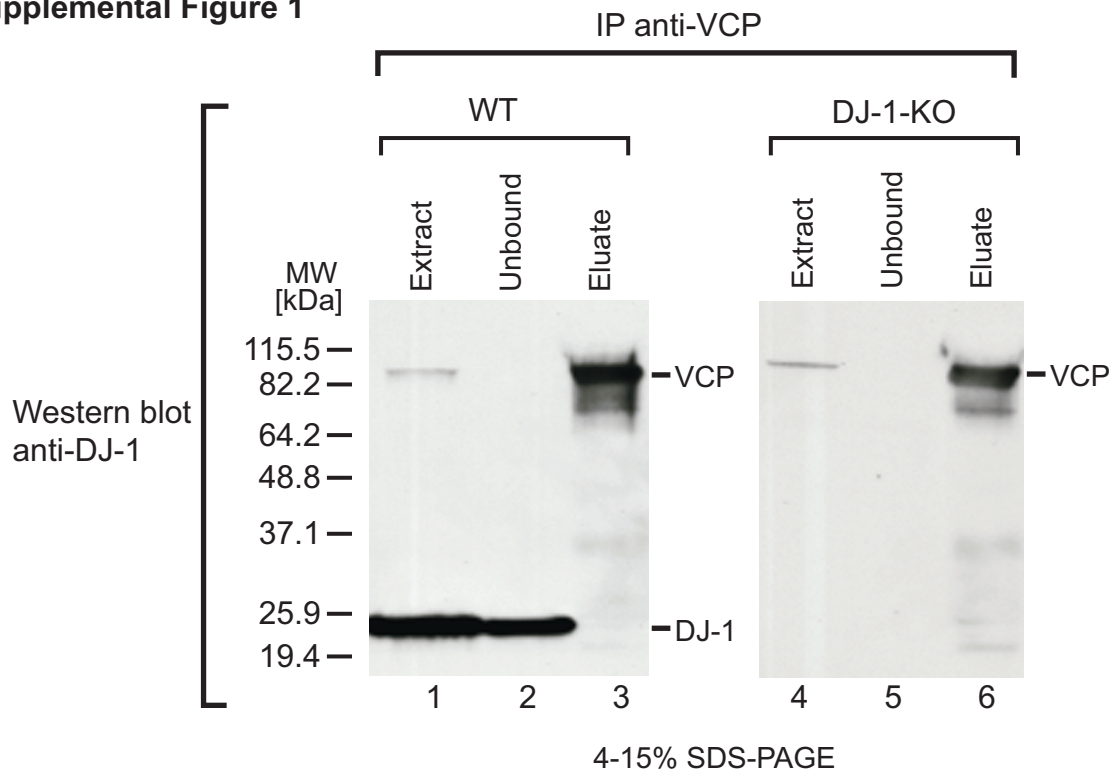



Supplemental Figure 3

A

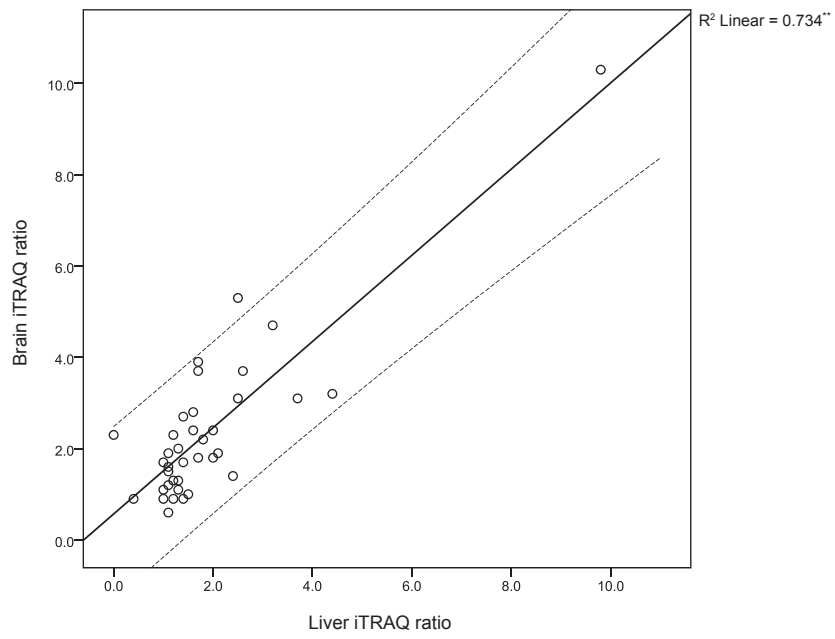

\*\* Pearson correlation coefficient = 0.857 (significant at the 0.01 level, 2-tailed)

B

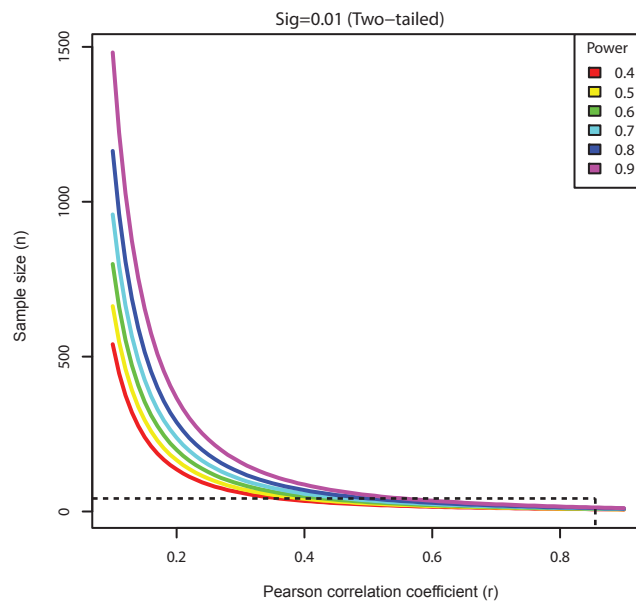



|                              |              |         |         |        |         |                  |         |                  |                         |                       |                                                   |                                                                     |                    |      |      |      |      |      |
|------------------------------|--------------|---------|---------|--------|---------|------------------|---------|------------------|-------------------------|-----------------------|---------------------------------------------------|---------------------------------------------------------------------|--------------------|------|------|------|------|------|
|                              | 2            | 0.02    | 1219.85 | 610.33 | 1218.63 | 610.32 EATTEGQLR | I:TRAQ  |                  | 99                      | 0.0                   | 0.0                                               | 48.5                                                                | 51.5               |      |      |      |      |      |
|                              | 2            | -0.02   | 1087.87 | 534.79 | 1087.69 | 534.80 QNVKAEK   | I:TRAQ  | I:TRAQ(K)@7      | 98                      | 0.8                   | 2.7                                               | 43.3                                                                | 53.2               |      |      |      |      |      |
|                              | 2            | 0.02    | 1151.60 | 576.81 | 1151.58 | 576.80 EYWNLRK   | I:TRAQ  |                  | 94                      | 1.8                   | 3.9                                               | 41.6                                                                | 52.7               |      |      |      |      |      |
|                              | 2            | 0.06    | 1118.61 | 593.31 | 1118.55 | 593.29 DAAELWQK  | I:TRAQ  | I:TRAQ-Lys-Gln@9 | 90                      | 3.7                   | 7.5                                               | 26.4                                                                | 52.4               |      |      |      |      |      |
|                              |              |         |         |        |         |                  |         |                  | Average                 | 2.1                   | 4.8                                               | 43.0                                                                | 50.7               |      |      |      |      |      |
|                              |              |         |         |        |         |                  |         |                  | STDEV                   | 2.1                   | 4.4                                               | 4.7                                                                 | 3.1                |      |      |      |      |      |
| Enolase, alpha               | IP00756027.1 | 4       | 28.6    | 3      | -0.93   | 2247.19          | 750.07  | 2248.12          | 750.38 DATNVVDEGGFAPNLK | I:TRAQ                | I:TRAQ(K)@19                                      | 99                                                                  | 12.8               | 52.4 | 8.4  | 26.4 |      |      |
|                              |              |         |         |        |         |                  |         |                  |                         |                       |                                                   | 98                                                                  | 12.0               | 45.2 | 9.8  | 33.0 |      |      |
|                              |              |         |         |        |         |                  |         |                  |                         |                       |                                                   | 98                                                                  | 14.6               | 41.7 | 14.0 | 28.8 |      |      |
|                              |              |         |         |        |         |                  |         |                  |                         |                       |                                                   | 95                                                                  | 11.7               | 47.2 | 11.2 | 27.6 |      |      |
|                              |              |         |         |        |         |                  |         |                  |                         |                       |                                                   | Average                                                             | 12.8               | 47.2 | 11.2 | 27.6 |      |      |
|                              |              |         |         |        |         |                  |         |                  |                         |                       |                                                   | STDEV                                                               | 1.3                | 4.7  | 2.8  | 2.8  |      |      |
| HspA8                        | IP00480560.1 | 6       | 28.3    | 3      | -0.33   | 1936.96          | 646.66  | 1936.99          | 646.67 NZVMRPFNTYVDK    | I:TRAQ                | I:TRAQ(K)@15                                      | 99                                                                  | 12.7               | 42.0 | 9.5  | 35.8 |      |      |
|                              |              |         |         |        |         |                  |         |                  |                         |                       |                                                   | 95                                                                  | 13.4               | 41.7 | 5.7  | 39.2 |      |      |
|                              |              |         |         |        |         |                  |         |                  |                         |                       |                                                   | 94                                                                  | 17.9               | 62.6 | 0.0  | 19.5 |      |      |
|                              |              |         |         |        |         |                  |         |                  |                         |                       |                                                   | 90                                                                  | 10.4               | 41.0 | 10.2 | 38.3 |      |      |
|                              |              |         |         |        |         |                  |         |                  |                         |                       |                                                   | 89                                                                  | 10.6               | 46.1 | 4.6  | 38.4 |      |      |
|                              |              |         |         |        |         |                  |         |                  |                         |                       |                                                   | 84                                                                  | 20.5               | 30.9 | 23.4 | 25.2 |      |      |
|                              |              |         |         |        |         |                  |         |                  |                         |                       |                                                   | Average                                                             | 14.2               | 44.1 | 8.5  | 32.8 |      |      |
|                              |              |         |         |        |         |                  |         |                  |                         |                       |                                                   | STDEV                                                               | 4.1                | 10.4 | 8.0  | 8.3  |      |      |
| Superoxide dismutase SOD1    | IP00130589.7 | 2       | 28.3    | 2      | 0.02    | 1317.68          | 659.85  | 1317.66          | 659.84 DGVANVSEDR       | I:TRAQ                |                                                   | 99                                                                  | 9.4                | 14.3 | 31.8 | 44.5 |      |      |
|                              |              |         |         |        |         |                  |         |                  |                         |                       |                                                   | 99                                                                  | 5.8                | 22.0 | 25.0 | 47.2 |      |      |
|                              |              |         |         |        |         |                  |         |                  |                         |                       |                                                   | Average                                                             | 7.6                | 19.1 | 28.4 | 46.8 |      |      |
|                              |              |         |         |        |         |                  |         |                  |                         |                       |                                                   | STDEV                                                               | 2.5                | 5.4  | 4.8  | 1.9  |      |      |
| Peroxiredoxin-1              | IP00848536.1 | 18,927  | 4       | 26.8   | 2       | 0.00             | 1037.53 | 519.77           | 1037.53                 | 519.77 ADEGISFR       | I:TRAQ                                            |                                                                     | 99                 | 7.1  | 17.5 | 12.9 | 62.4 |      |
|                              |              |         |         |        |         |                  |         |                  |                         |                       |                                                   | 99                                                                  | 6.1                | 27.2 | 12.4 | 84.1 |      |      |
|                              |              |         |         |        |         |                  |         |                  |                         |                       |                                                   | 98                                                                  | 6.1                | 12.7 | 15.4 | 66.1 |      |      |
|                              |              |         |         |        |         |                  |         |                  |                         |                       |                                                   | Average                                                             | 6.0                | 19.1 | 13.9 | 61.0 |      |      |
|                              |              |         |         |        |         |                  |         |                  |                         |                       |                                                   | STDEV                                                               | 1.4                | 7.4  | 2.2  | 6.3  |      |      |
| Carbonic anhydrase 3         | IP00221890.6 | 4       | 28.2    | 3      | 0.02    | 1625.88          | 542.87  | 1625.86          | 542.86 QDNQSPLENTK      | I:TRAQ                | I:TRAQ(K)@12                                      | 99                                                                  | 23.9               | 32.8 | 11.4 | 32.8 |      |      |
|                              |              |         |         |        |         |                  |         |                  |                         |                       |                                                   | 99                                                                  | 12.7               | 33.9 | 12.3 | 41.1 |      |      |
|                              |              |         |         |        |         |                  |         |                  |                         |                       |                                                   | 97                                                                  | 9.9                | 5.0  | 19.6 | 80.4 |      |      |
|                              |              |         |         |        |         |                  |         |                  |                         |                       |                                                   | Average                                                             | 13.9               | 22.2 | 14.4 | 51.2 |      |      |
|                              |              |         |         |        |         |                  |         |                  |                         |                       |                                                   | STDEV                                                               | 11.5               | 19.3 | 4.5  | 25.4 |      |      |
| HspA5                        | IP00319992.1 | 3       | 26.0    | 3      | 0.01    | 2124.14          | 709.06  | 2124.13          | 709.05 SDFSTASDNGQPTVTK | I:TRAQ                | I:TRAQ(K)@17                                      | 99                                                                  | 13.6               | 7.7  | 39.2 | 39.5 |      |      |
|                              |              |         |         |        |         |                  |         |                  |                         |                       |                                                   | 93                                                                  | 10.6               | 42.4 | 26.8 | 11.1 |      |      |
|                              |              |         |         |        |         |                  |         |                  |                         |                       |                                                   | 93                                                                  | 10.6               | 18.6 | 34.0 | 45.2 |      |      |
|                              |              |         |         |        |         |                  |         |                  |                         |                       |                                                   | Average                                                             | 14.5               | 16.2 | 30.6 | 38.7 |      |      |
|                              |              |         |         |        |         |                  |         |                  |                         |                       |                                                   | STDEV                                                               | 11.1               | 8.4  | 10.8 | 7.2  |      |      |
| Glutamate dehydrogenase 1    | IP00114209.1 | 3       | 25.6    | 3      | -0.01   | 1634.81          | 545.84  | 1634.82          | 545.85 DVHSGGLATYSR     | I:TRAQ                |                                                   | 99                                                                  | 12.1               | 20.2 | 28.3 | 39.5 |      |      |
|                              |              |         |         |        |         |                  |         |                  |                         |                       |                                                   | 97                                                                  | 19.9               | 32.6 | 21.0 | 26.5 |      |      |
|                              |              |         |         |        |         |                  |         |                  |                         |                       |                                                   | 95                                                                  | 4.8                | 21.9 | 20.9 | 42.3 |      |      |
|                              |              |         |         |        |         |                  |         |                  |                         |                       |                                                   | Average                                                             | 12.1               | 29.7 | 26.1 | 36.1 |      |      |
|                              |              |         |         |        |         |                  |         |                  |                         |                       |                                                   | STDEV                                                               | 7.5                | 6.7  | 5.2  | 8.4  |      |      |
| Syntaxin-binding protein 1   | IP00415403.1 | 4       | 22.7    | 3      | -0.01   | 1519.70          | 507.87  | 1519.71          | 507.88 ADQPTAKDQPK      | I:TRAQ                | I:TRAQ(K)@12                                      | 99                                                                  | 18.8               | 55.6 | 9.3  | 16.3 |      |      |
|                              |              |         |         |        |         |                  |         |                  |                         |                       |                                                   | 99                                                                  | 17.8               | 70.6 | 6.3  | 5.3  |      |      |
|                              |              |         |         |        |         |                  |         |                  |                         |                       |                                                   | 98                                                                  | 20.5               | 71.9 | 2.4  | 5.2  |      |      |
|                              |              |         |         |        |         |                  |         |                  |                         |                       |                                                   | 74                                                                  | 15.5               | 71.3 | 3.4  | 9.8  |      |      |
|                              |              |         |         |        |         |                  |         |                  |                         |                       |                                                   | Average                                                             | 18.2               | 67.3 | 5.4  | 9.1  |      |      |
|                              |              |         |         |        |         |                  |         |                  |                         |                       |                                                   | STDEV                                                               | 2.1                | 7.8  | 3.1  | 5.2  |      |      |
| Lactate dehydrogenase        | IP00869393.1 | 38,368  | 2       | 22.7   | 2       | 0.01             | 1287.69 | 644.85           | 1287.68                 | 644.85 VTLTFREEAR     | I:TRAQ                                            |                                                                     | 99                 | 6.7  | 13.4 | 28.6 | 51.3 |      |
|                              |              |         |         |        |         |                  |         |                  |                         |                       |                                                   | 95                                                                  | 13.2               | 20.2 | 28.6 | 40.8 |      |      |
|                              |              |         |         |        |         |                  |         |                  |                         |                       |                                                   | Average                                                             | 7.6                | 16.6 | 17.5 | 46.1 |      |      |
|                              |              |         |         |        |         |                  |         |                  |                         |                       |                                                   | STDEV                                                               | 4.1                | 4.8  | 1.4  | 7.4  |      |      |
| Ketoadid dehydrogenase E1    | IP00331555.2 | 50,774  | 2       | 21.7   | 3       | 0.02             | 1799.95 | 600.99           | 1799.93                 | 600.98 VDDNDYFAVYNATK | I:TRAQ                                            | I:TRAQ(K)@14                                                        | 99                 | 19.5 | 20.2 | 25.1 | 35.3 |      |
|                              |              |         |         |        |         |                  |         |                  |                         |                       |                                                   | 99                                                                  | 15.3               | 37.4 | 12.0 | 19.4 |      |      |
|                              |              |         |         |        |         |                  |         |                  |                         |                       |                                                   | Average                                                             | 17.4               | 26.8 | 18.5 | 27.3 |      |      |
|                              |              |         |         |        |         |                  |         |                  |                         |                       |                                                   | STDEV                                                               | 11.2               | 9.3  | 9.3  | 11.2 |      |      |
| Creatine kinase B-type       | IP00136703.1 | 2       | 21.0    | 2      | -0.03   | 1174.62          | 588.32  | 1174.65          | 588.33 LLMEMQR          | I:TRAQ                |                                                   | 99                                                                  | 24.6               | 68.8 | 2.5  | 0.0  |      |      |
|                              |              |         |         |        |         |                  |         |                  |                         |                       |                                                   | 97                                                                  | 18.6               | 69.4 | 0.0  | 0.0  |      |      |
|                              |              |         |         |        |         |                  |         |                  |                         |                       |                                                   | Average                                                             | 29.6               | 69.1 | 1.3  | 0.0  |      |      |
|                              |              |         |         |        |         |                  |         |                  |                         |                       |                                                   | STDEV                                                               | 1.4                | 0.4  | 1.8  | 0.0  |      |      |
| Ig gamma 2b                  | IP00754836.2 | 8       | 19.3    | 3      | 0.03    | 1793.98          | 599.00  | 1793.96          | 599.99 VVSTLPHQDQWM     | I:TRAQ                | I:TRAQ(K)@5; Deamidated(Q)@10; Dethiomethyl(M)@13 | cleaved M-S@C-term                                                  | 99                 | 25.2 | 17.8 | 24.1 | 32.9 |      |
|                              |              |         |         |        |         |                  |         |                  |                         |                       |                                                   | I:TRAQ                                                              | 99                 | 16.6 | 43.5 | 28.8 | 11.1 |      |
|                              |              |         |         |        |         |                  |         |                  |                         |                       |                                                   | I:TRAQ                                                              | 99                 | 24.2 | 25.1 | 20.9 | 29.8 |      |
|                              |              |         |         |        |         |                  |         |                  |                         |                       |                                                   | I:TRAQ                                                              | 99                 | 27.1 | 30.2 | 21.5 | 21.2 |      |
|                              |              |         |         |        |         |                  |         |                  |                         |                       |                                                   | No I:TRAQ; Deamidated(Q)@4; I:TRAQ(K)@8; Phospho(T)@8; I:TRAQ(K)@23 | cleaved H-T@N-term | 97   | 30.2 | 29.2 | 19.1 | 21.5 |
|                              |              |         |         |        |         |                  |         |                  |                         |                       |                                                   | I:TRAQ                                                              | 99                 | 23.5 | 20.1 | 28.6 | 17.6 |      |
|                              |              |         |         |        |         |                  |         |                  |                         |                       |                                                   | I:TRAQ                                                              | 99                 | 27.3 | 26.8 | 22.8 | 23.0 |      |
|                              |              |         |         |        |         |                  |         |                  |                         |                       |                                                   | I:TRAQ                                                              | 98                 | 20.8 | 15.2 | 28.9 | 37.1 |      |
|                              |              |         |         |        |         |                  |         |                  |                         |                       |                                                   | Average                                                             | 30.0               | 27.2 | 23.5 | 24.3 |      |      |
|                              |              |         |         |        |         |                  |         |                  |                         |                       |                                                   | STDEV                                                               | 3.5                | 8.6  | 2.9  | 8.5  |      |      |
| Phosphoglycerate kinase 1    | IP00555069.3 | 3       | 19.2    | 3      | 0.02    | 1777.91          | 593.64  | 1777.89          | 593.64 LGDYYNDAFGTAHR   | I:TRAQ                |                                                   | 99                                                                  | 12.5               | 11.6 | 31.3 | 44.6 |      |      |
|                              |              |         |         |        |         |                  |         |                  |                         |                       |                                                   | 92                                                                  | 8.5                | 33.9 | 24.1 | 33.5 |      |      |
|                              |              |         |         |        |         |                  |         |                  |                         |                       |                                                   | 81                                                                  | 9.3                | 36.4 | 25.0 | 30.3 |      |      |
|                              |              |         |         |        |         |                  |         |                  |                         |                       |                                                   | Average                                                             | 10.1               | 27.3 | 26.5 | 36.1 |      |      |
|                              |              |         |         |        |         |                  |         |                  |                         |                       |                                                   | STDEV                                                               | 2.1                | 13.6 | 4.2  | 7.5  |      |      |
| Adenosylhomocysteinase       | IP00505533.1 | 3       | 19.0    | 3      | -0.01   | 1938.00          | 646.34  | 1938.01          | 646.35 GIBSEETTDVHNLKY  | I:TRAQ                | I:TRAQ(K)@15                                      | 99                                                                  | 8.8                | 16.2 | 24.5 | 49.5 |      |      |
|                              |              |         |         |        |         |                  |         |                  |                         |                       |                                                   | 96                                                                  | 0.0                | 0.0  | 34.7 | 65.3 |      |      |
|                              |              |         |         |        |         |                  |         |                  |                         |                       |                                                   | 85                                                                  | 39.9               | 13.4 | 32.9 | 49.8 |      |      |
|                              |              |         |         |        |         |                  |         |                  |                         |                       |                                                   | Average                                                             | 14.6               | 9.9  | 30.7 | 54.9 |      |      |
|                              |              |         |         |        |         |                  |         |                  |                         |                       |                                                   | STDEV                                                               | 4.9                | 8.7  | 5.4  | 9.1  |      |      |
| Catalase                     | IP00869393.1 | 3       | 16.9    | 3      | 0.00    | 1534.73          | 512.58  | 1534.73          | 512.58 NFDVHPDVGAR      | I:TRAQ                |                                                   | 99                                                                  | 18.9               | 15.1 | 18.0 | 48.0 |      |      |
|                              |              |         |         |        |         |                  |         |                  |                         |                       |                                                   | 88                                                                  | 6.0                | 16.5 | 25.4 | 21.1 |      |      |
|                              |              |         |         |        |         |                  |         |                  |                         |                       |                                                   | 79                                                                  | 3.5                | 8.2  | 25.6 | 63.8 |      |      |
|                              |              |         |         |        |         |                  |         |                  |                         |                       |                                                   | Average                                                             | 9.5                | 13.3 | 22.5 | 54.9 |      |      |
|                              |              |         |         |        |         |                  |         |                  |                         |                       |                                                   | STDEV                                                               | 9.3                | 4.5  | 4.0  | 9.2  |      |      |
| Argininosuccinate lyase      | IP00214788.5 | 2       | 13.4    | 2      | 0.03    | 1660.94          | 554.65  | 1660.91          | 554.64 AEMQQLGDLK       | I:TRAQ                | I:TRAQ(K)@12                                      | 99                                                                  | 5.1                | 8.4  | 26.0 | 60.5 |      |      |
|                              |              |         |         |        |         |                  |         |                  |                         |                       |                                                   | 98                                                                  | 1.2                | 6.6  | 33.2 | 59.1 |      |      |
|                              |              |         |         |        |         |                  |         |                  |                         |                       |                                                   | Average                                                             | 3.2                | 7.5  | 29.6 | 59.8 |      |      |
|                              |              |         |         |        |         |                  |         |                  |                         |                       |                                                   | STDEV                                                               | 2.8                | 1.2  | 5.1  | 1.0  |      |      |
| Carbamoyl-phosphate synthase | IP00111908.8 | 168,495 | 4       | 12.9   | 2       | 0.02             | 1233.71 | 617.86           | 1233.68                 | 617.85 VPAHYQVTR      | I:TRAQ                                            |                                                                     | 97                 | 4.3  | 9.7  | 24.3 | 61.7 |      |
|                              |              |         |         |        |         |                  |         |                  |                         |                       |                                                   | 96                                                                  | 0.0                | 0.0  | 31.0 | 69.0 |      |      |
|                              |              |         |         |        |         |                  |         |                  |                         |                       |                                                   | 93                                                                  | 4.7                | 7.0  | 37.6 | 60.7 |      |      |
|                              |              |         |         |        |         |                  |         |                  |                         |                       |                                                   |                                                                     |                    |      |      |      |      |      |
